# Supplementary material for: To Lose a Loved One by Medical Assistance in Dying or by Natural Death with Palliative Care: A Mixed Methods Comparison of Grief Experiences
Source: PubMed Central journal article supplement — Omega (Westport). 2022 Apr 14;89(3):931–53. doi: 10.1177/00302228221085191 (PMC11317015; doi:10.1177/00302228221085191), 2022-04-14
Supplement: sj-pdf-1-ome-10.1177_00302228221085191.pdf [file sj-pdf-1-ome-10.1177_00302228221085191.pdf]

## **Appendix 1**

### *Qualitative Interview Guide*

#### **Context**

- Can you briefly describe to me the context in which your loved one died? I would like to have an overview of the events. How did the death take place?
- Were you there during the death? How did you experience this moment or how did you experience your absence?
- (How did you react when you learned your loved one will be receiving MAiD? How did you experience the last days/weeks before the administration of MAiD?)

#### **Reactions to the loss**

- How did you react when your loved one died? Did you experience any particular emotions? Any physical sensations? Did you have certain thoughts? Did you do particular things (behaviors)?
- Have your reactions evolved/changed between the death and today? If so, how have they evolved/changed? If not, in your opinion, why didn't they change?

#### **Relationship with the deceased**

- How would you describe the relationship you had with your loved one at the moment of his/her death?
- How would you describe the relationship you have with him/her today; with his/her memory; with his/her image?
- Does the relationship you have with his/her memory differ from the relationship you had with him/her while he/she was still alive? How so?

#### **Adaptation to the death**

- Has your life, and day-to-day life, changed since the death of your loved one? If so, what has changed in your life and how have you adapted to these changes? If not, in your opinion, how come nothing has changed?

**Support received and representations of this support**

- Do you receive, or did you receive support during your bereavement? If so, can you tell me a little bit more about how you feel towards this support? If not, can you tell me why you did not receive support?
- How do you feel/believe that those close to you/around you/in your environment perceive you while you are(were) in the process of grieving?
- How do you feel about these perceptions?
- How do you see MAiD/NDPC? What is your opinion of it?
- How do you feel the people around you perceive MAiD/NDPC? Do their opinions affect you? If yes, how? If not, why?

Do you have something to add? Something that we have forgotten to talk about?

How did you experience the discussion we just had?

-

MAID = Medical assistance in dying ; NDPC = Natural death with palliative care
